# Supplementary material for: Repeat optical satellite images reveal widespread and long term decrease in land-terminating glacier speeds
Source: Copernicus journal article supplement (doi:10.5194/tc-6-467-2012), 2012-04-10
Supplement: Supplementary file 1 [file Glaciers.xlsx]

## Sheet: Sheet1
Latitude and longitude of the studied glaciers. Names are included when available.
Region and glacier number	Name	Lat.	Long.
Pamir
1	Fedchenko	39.037	72.307
2	Medvezhiy	38.665	72.222
3	Geograficheskogo Obshchestva	38.72	72.11
4	Bivachniy	38.941	72.157
5		38.944	72.124
6		39.003	72.184
7		39.063	72.09
8		38.996	71.919
9		39.008	71.986
10		39.11	72.035
11		39.072	72.207
12		38.887	72.367
13		38.868	72.48
14		38.842	72.511
15	Grum-Grzhimailo	38.867	72.298
16		38.654	72.521
17		38.606	72.488
18		38.691	72.463
19		38.696	72.42
20		39.368	72.526
21		39.366	72.65
22		38.949	72.575
23		38.905	72.566
24		38.892	72.593
25		38.892	72.575
26		38.834	72.714
27		38.839	72.659
28		38.761	72.548
29		38.781	72.328
30		38.458	72.453
31		38.46	72.292
32		38.375	72.247
33		38.411	72.192
34		38.303	71.974
35		38.495	72.169
36		38.574	72.219
37		38.792	71.959
38	Garmo	38.835	71.905
39		38.845	71.985
40	Maliy Saukdara	39.267	72.865
41		39.252	72.933
42	Oktyabr'skiy	39.269	73.018
43		39.425	73.055
44	Dzerzhinskogo	39.268	72.814
45		39.409	72.877
46		39.275	73.178
47		39.325	73.15
48		39.223	72.993
49	Severniy Zulumart	39.143	72.841
50		39.06	72.881
Caucasus
1	Ulluchiran	43.401	42.425
2	Irik	43.308	42.54
3		43.183	42.638
4		43.119	42.723
5		43.179	42.729
6		43.158	42.74
7		43.166	42.77
8		43.156	42.778
9		43.117	42.867
10		43.102	42.917
11		43.075	42.958
12		42.998	42.991
13	Bezengi	43.069	43.086
14	Mizhirgitchiran	43.075	43.164
15	Ulluazna	43.077	43.26
16	Dykh-su	42.985	43.211
Penny Ice Cap
1		67.539	-66.255
2		67.529	-66.037
3		67.355	-65.46
4		67.359	-65.258
5		67.166	-65.127
6		67.108	-65.031
7		66.941	-64.888
8		66.869	-64.785
9		66.75	-65.045
10		66.739	-65.647
11		66.91	-66.019
12		66.971	-66.198
Alaska Range
1	Kahiltna Glacier	62.581	-151.266
2	Yentna Glacier	62.689	-151.743
3	Lacuna Glacier	62.81	-151.456
4	Dall Glacier	62.599	-151.999
5	Straightaway Glacier	63.084	-151.308
6	Peters Glacier	63.188	-150.998
7	Eldridge Glacier	63.022	-150.12
8	Ruth Glacier	62.741	-150.569
9	Tokositna Glacier	62.827	-150.861
Patagonia
1		-48.469	-73.721
2	Glaciar Jorge Montt	-48.522	-73.505
3	Glaciar Bravo	-48.631	-73.241
4	Glaciar O'Higgins	-48.902	-73.199
5	Glaciar Gaea	-48.966	-73.157
6	Glaciar Viedma	-49.525	-73.004
7		-49.056	-73.712
8		-48.893	-73.789
9	Glaciar Occidental	-48.806	-73.928
10	Glaciar Bernardo	-48.655	-73.801
Karakoram
1	Biafo	35.709	75.898
2		35.826	75.646
3		35.776	75.781
4		35.814	75.739
5		35.829	75.725
6		35.882	75.756
7		35.91	75.779
8		35.9	75.738
9		35.648	75.714
10		35.58	75.832
11		35.568	75.885
12		35.605	75.95
13		35.535	76.005
14		35.517	75.998
15		35.531	76.013
16		35.487	76.126
17	Lokpar	35.492	76.249
18		35.504	76.23
19		35.535	76.211
20		35.561	76.227
21		35.532	76.195
22	Masherbrum	35.561	76.308
23		35.582	76.297
24	Gondokoro	35.572	76.382
25		35.612	76.412
26		35.628	76.44
27		35.484	76.49
28		35.453	76.523
29		35.552	76.476
30		35.538	76.524
31		35.463	76.636
32		35.489	76.603
33	Kondus	35.499	76.699
34		35.591	76.692
35		35.698	76.534
36	Baltoro	35.736	76.376
37		35.715	76.448
38		35.713	76.349
39		35.7	76.321
40	Liligo	35.674	76.223
41		35.769	76.216
42	Trango	35.747	76.177
43		35.783	76.13
44		35.762	76.273
45	Chagaran	35.785	76.295
46		35.793	76.319
47		35.778	76.407
48		35.777	76.521
49		35.836	76.517
50		35.771	76.546
51		35.746	76.56
52		35.857	76.717
53		35.817	76.699
54		35.806	76.746
55		35.778	76.74
56	Staghan	35.742	76.823
57		35.714	76.937
58		35.688	77.007
59		35.662	77.028
60		35.644	77.182
61		35.608	77.202
62		35.584	77.237
63		35.61	77.306
64	Braldu	36.202	75.86
65		36.33	76.041
66		36.362	75.964
67		36.36	75.946
68		36.29	75.965
69		36.28	76.012
6		36.281	75.998
71		36.287	75.984
72		36.282	76.066
73		36.235	76.142
74	Skamri	36.073	76.129
75		36.117	76.061
76	Bei Yengisogat	36.128	76.138
77		36.146	76.094
78		36.117	76.117
79		36.12	76.133
80		36.042	76.198
81	Choktoi	35.883	75.967
82	Nobande Sobonde	35.954	76.017
83	Dumulter	35.843	75.923
84	South Chiring	35.919	76.04
85	Sarpo Laggo	35.923	76.305
86	Moni	35.893	76.302
87	NW Skyang	35.905	76.329
88		35.868	76.202
89	West Chang Tok	35.897	76.234
90		35.874	76.201
91		35.912	76.249
92		35.982	76.33
93		36.022	76.463
94		36.012	76.546
95		37.987	76.557
96		35.991	76.481
97		35.895	76.671
98		35.407	76.252
99		35.374	76.768
100	Chumik-Bilafond	35.287	76.888
101		35.288	76.907
102		35.222	76.899
103	Siachen	35.296	77.194
104	Teram Shehr	35.489	77.156
105		35.357	77.137
106		35.239	77.103
107	Selkar Chorten-North Terong	35.261	77.3
108	South Terong	35.218	77.372
109	South Rimo	35.341	77.477
110	Central Rimo	35.441	77.486
111	North Rimo	35.465	77.502
112		35.753	76.014
113		35.771	76.031
114	Drenmang	35.981	76.039
115		35.973	76.054
116		35.205	77.359
117		35.178	77.305
118		35.333	76.8
119		35.36	76.807
120		35.744	77.538
121		35.513	77.52
122		36.185	76.741
123		36.15	76.78
124	Momhil	36.468	75.062
125	Pasu	36.465	74.796
126	Ghulkin	36.422	74.84
127		36.41	74.825
128		36.42	74.493
129		36.458	74.418
130	Batura	36.526	74.761
131		36.584	74.605
132	Yasghil	36.38	75.376
133		36.295	75.327
134	Khurdopin	36.289	75.476
135	Yukshin Gardan	36.308	75.43
136	Hispar	36.108	75.219
137	Khanbasa	36.088	75.404
138	Jutmau	36.145	75.313
139	Pumarikish	36.146	75.209
140	Khiang	36.209	75.128
141	Garumbar	36.1	75.006
142	Hopar	36.126	74.978
143		36.194	74.829
144	Sumaiyar Bur-Burpu	36.135	74.884
145	Minapin	36.181	74.594
146		36.102	74.576
147	Mani	35.888	74.887
148		35.944	74.875
149		35.861	75.235
150		35.9	75.105
151		35.929	75.093
152		36.019	75.065
153		35.991	75.361
154		35.971	75.446
155		35.935	75.463
156		35.6	75.161
157		36.013	75.12
158	Makrong	36.077	75.155
159		36.007	75.244
160	Kutiah	35.78	75.043
161		35.823	75.01
162		35.816	75.079
163		35.837	75.173
164		36.771	74.332
165		36.761	74.408
166		36.653	74.527
167		36.411	74.483
168		36.376	74.499
169		36.451	75.021
170		36.422	74.974
171	Taura West	36.26	74.921
172		36.228	75.106
173		36.448	75.157
174	Virjerab	36.304	75.619
175		36.252	75.626
176		35.777	75.237
177		35.794	75.211
178	Shigar-Basha	35.767	75.274
179		35.815	74.845
180		36.296	75.586
181	Mulunqutti	36.443	75.221
